# Supplementary material for: Simple construction of GdBiVO4 assembled on reduced graphene oxide for selective and sensitive electrochemical detection of chloramphenicol in food samples
Source: Royal Society of Chemistry journal article supplement (doi:10.1039/d1nj04457e), 2021-11-23
Supplement: d1nj04457e1.pdf [file d1nj04457e1.pdf]

**Simple construction of GdBiVO<sub>4</sub> assembled on reduced graphene oxide for selective and sensitive electrochemical detection of chloramphenicol in food samples**

**Praveen kumar Gopi<sup>a</sup>, Subburaj Srinithi<sup>a</sup>, Shen-Ming chen<sup>a\*</sup>, and Chandan Hunsur Ravikumar<sup>b,c</sup>**

<sup>a</sup> Electroanalysis and Bioelectrochemistry Lab, Department of Chemical Engineering and Biotechnology, National Taipei University of Technology, No. 1, Section 3, Chung-Hsiao East Road, Taipei 106, Taiwan, ROC.

<sup>b</sup> Pilot Plant Development and Training Institute, King Mongkut's University of Technology Thonburi, Bangkhuntien-Chaitalay Road, Thakam, Bangkok 10150, Thailand.

<sup>c</sup> Centre for Nano and Materials Sciences, Jain global campus, Jain University, Jakkasandra post Ramanagaram dist. India 52110

**\*Corresponding author:**

Prof. Shen-Ming Chen (S.M. Chen)

Tel: (886)-2-27017147; Fax: (886)-2-27025238

E-mail: [smchen78@ms15.hinet.net](mailto:smchen78@ms15.hinet.net)

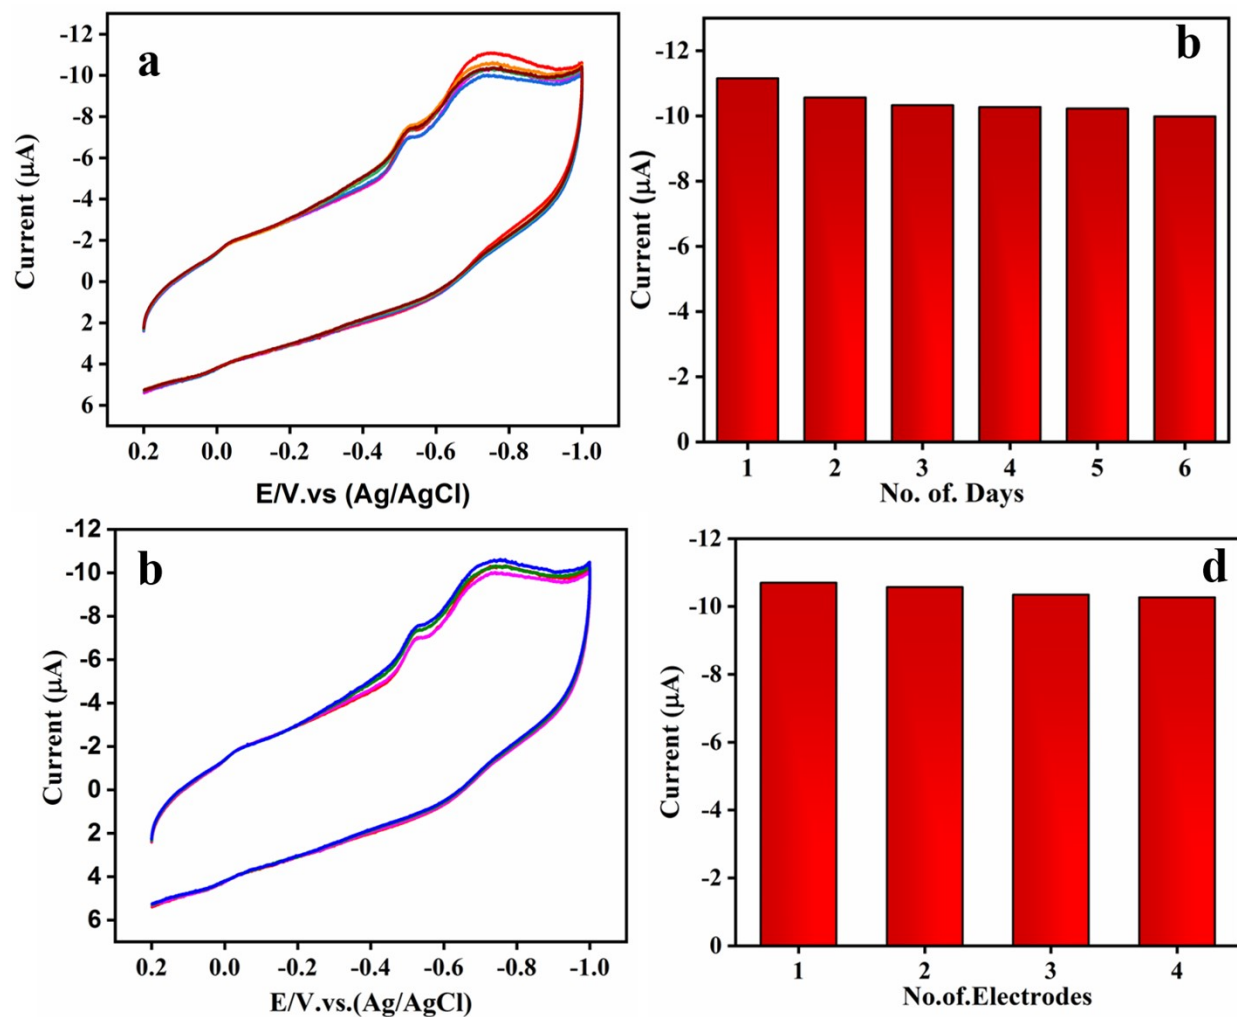

**Fig S1:** a) CVs of GdBiVO<sub>4</sub>@rGO/SPCE in the presence of 0.05 M pH 7 solution with 200 μM of CP for no of days. b) Calibration plot for no of days vs current. c) CVs of GdBiVO<sub>4</sub>@rGO/SPCE in the presence of 0.05M pH 7 solution with 200 μM of CP at no of electrodes. d) calibration plot for no of electrodes vs current
